# Supplementary material for: Increased Body Mass Index during Therapy for Childhood Acute Lymphoblastic Leukemia: A Significant and Underestimated Complication
Source: Hindawi journal article supplement (doi:10.1155/2015/386413), 2015-01-01
Supplement: f1 [file 386413.f1.pdf]

Increased body mass index during therapy for childhood acute lymphoblastic leukemia:  
a significant and under-estimated complication

**Table of contents for Supplementary Material**

|                                                                                                                                                                                                                                                                                                                                                                                                                                                                                                                                                                                                         |   |
|---------------------------------------------------------------------------------------------------------------------------------------------------------------------------------------------------------------------------------------------------------------------------------------------------------------------------------------------------------------------------------------------------------------------------------------------------------------------------------------------------------------------------------------------------------------------------------------------------------|---|
| Table S1 Mixed effects multivariate regression analyses for BMI z-scores.....                                                                                                                                                                                                                                                                                                                                                                                                                                                                                                                           | 2 |
| Figure S1.....                                                                                                                                                                                                                                                                                                                                                                                                                                                                                                                                                                                          | 3 |
| Selected scenarios in the mixed-effects model adjusted for sex, age at diagnosis, risk profile, if both males and females received the same maintenance steroid dose and had a BMI z-score of zero at the start of treatment. Predicted means for BMI z-scores and 95% confidence intervals for (A) 2 y at diagnosis with standard risk (B) 4 y at diagnosis with standard risk (C) 6 y at diagnosis with standard risk (D) 8 y at diagnosis with standard risk (E) 10 y at diagnosis with high risk (F) 12 y at diagnosis with high risk. Dotted lines are means of healthy (Raine Study) individuals. |   |

Table S1: Mixed effects multivariate regression analyses for BMI z-scores

| <b>BMI z-score (SDs)</b>                                            | <b>Estimate</b> | <b>SE</b> | <b>p-value</b>        |
|---------------------------------------------------------------------|-----------------|-----------|-----------------------|
| Intercept                                                           | 0.548           | 0.282     | 0.05                  |
| Age (years)                                                         | -1.059          | 0.231     | $5 \times 10^{-6}$    |
| Age <sup>2</sup> (years <sup>2</sup> )                              | 1.630           | 0.203     | $2 \times 10^{-15}$   |
| Age <sup>3</sup> (years <sup>3</sup> )                              | -0.751          | 0.0096    | $8 \times 10^{-15}$   |
| Age <sup>4</sup> (years <sup>4</sup> )                              | 0.106           | 0.015     | $1 \times 10^{-12}$   |
| Sex: Female                                                         | -0.735          | 0.274     | 0.009                 |
| NCI risk: High                                                      | -0.887          | 0.223     | $2 \times 10^{-4}$    |
| Age at diagnosis (years)                                            | 0.021           | 0.023     | 0.36                  |
| BMI z-score at diagnosis (SD)                                       | 0.821           | 0.059     | $< 2 \times 10^{-16}$ |
| Total steroid maintenance dose (mg/m <sup>2</sup> )                 | -0.0002         | 0.002     | 0.47                  |
| Age:Sex(Male) interaction                                           | 0.670           | 0.204     | 0.001                 |
| Age <sup>2</sup> :Sex(Male) interaction                             | -0.134          | 0.057     | 0.019                 |
| Age:NCI risk interaction                                            | 0.349           | 0.101     | $6 \times 10^{-4}$    |
| Sex(Male):NCI risk(high) interaction                                | -1.016          | 0.420     | 0.018                 |
| Age:Age at diagnosis (years) interaction                            | -0.045          | 0.011     | $6 \times 10^{-5}$    |
| Sex(Male):Age at diagnosis (years) interaction                      | 0.122           | 0.048     | 0.013                 |
| Age:BMI z-score at diagnosis (SD) interaction                       | -0.101          | 0.029     | $5 \times 10^{-4}$    |
| Age:Total steroid maintenance dose (mg/m <sup>2</sup> ) interaction | 0.0003          | 0.0001    | 0.004                 |
| Number of observations                                              | 2434            |           |                       |
| Number of individuals                                               | 80              |           |                       |
| Residual SD                                                         | 0.433           |           |                       |
| Compound symmetry Rho                                               | -0.000000005    |           |                       |

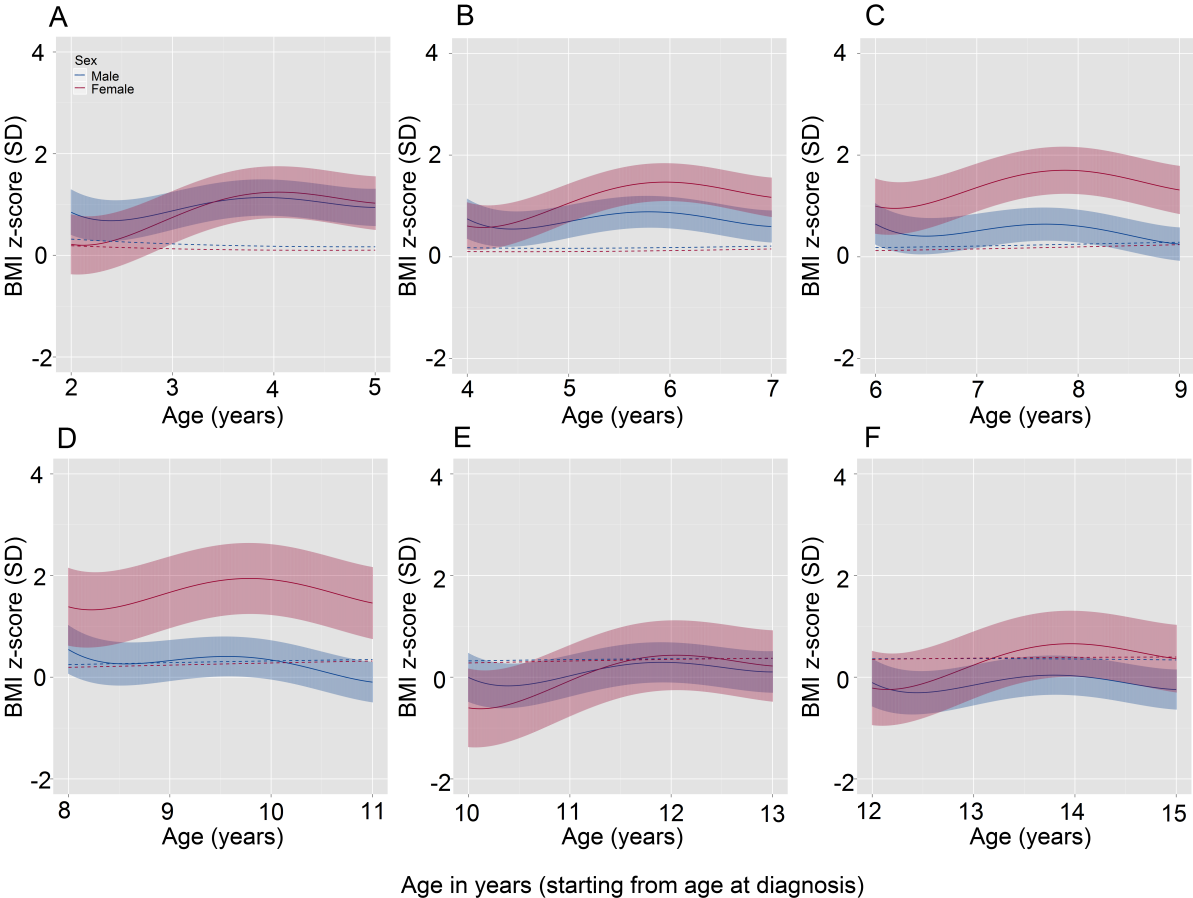

### Figure S1

Selected scenarios in the mixed effects model adjusted for sex, age at diagnosis, risk profile and adjusted if both males and females received the same dose of steroids during maintenance and had a BMI z-score of zero at the start of treatment. Predicted means for BMI z-scores and 95% confidence intervals for (A) 2 y at diagnosis with standard risk (B) 4 y at diagnosis with standard risk (C) 6 y at diagnosis with standard risk (D) 8 y at diagnosis with standard risk (E) 10 y at diagnosis with high risk (F) 12 y at diagnosis with high risk ALL. Dotted lines are means of healthy (Raine Study) individuals.
